# Supplementary material for: A fast iris recognition system through optimum feature extraction
Source: PeerJ journal article supplement (doi:10.7717/peerj-cs.184), 2019-04-08
Supplement: code9_PeerJ.zip [file code9_PeerJ.zip]

## Sheet: Sheet1
PCA	Grabor	Grabor+PCA	Proposed	Testing Iris sample
1.0931	1.6215	1.3755	0.9905	10
2.17	3.2032	2.7246	1.938	20
3.1735	4.7146	4.0168	2.8402	30
4.1654	6.2031	5.2653	3.7447	40
5.1477	7.7689	6.5259	4.7162	50
6.1296	9.2619	7.8298	5.5346	60
7.1786	10.7647	9.0948	6.4315	70
8.1283	12.3238	10.3897	7.3181	80
9.1554	13.7739	11.683	8.2514	90
11.0354	15.31	12.9525	9.1598	100
11.0352	15.3509	13.0499	9.1325	100
11.0338	15.2496	12.9177	9.1135
11.0573	15.2808	12.9376	9.1605
11.0192	15.2908	12.9349	9.2205
11.0345	15.2485	12.9676	9.1969
11.0216	15.378	12.988	9.1229
11.0466	15.3501	12.9019	9.1337
11.0573	15.3315	12.9225	9.1982
